# Supplementary material
Source: PubMed Central journal article supplement (PMC7608995)
Supplement: ASN.2020030320SupplementaryData.pdf [file ASN.2020030320SupplementaryData.pdf]

## Supplemental Material

Figure S1. Study outline and cross-sectional blood samples of kidney transplant patients.

Figure S2. Flow cytometry analyses of blood CD4<sup>+</sup>T cells.

Figure S3. Biaxial flow cytometry analyses of cT<sub>FH</sub>.

Figure S4. Biaxial flow cytometry analyses of Ki67<sup>+</sup>ICOS<sup>+</sup> compared to Ki67<sup>-</sup>ICOS<sup>-</sup> cT<sub>FH</sub>.

Figure S5. Flow cytometry analyses of cT<sub>FH</sub> cytokine production in response to donor-antigen stimulation.

Figure S6. Gating strategy for sorting cT<sub>FH</sub>, memory B cells and ABCs.

Figure S7. Co-culture analyses of cT<sub>FH</sub> with autologous memory B cells.

Figure S8. Flow cytometry analyses of ABCs and ASCs.

Figure S9. Correlation of cT<sub>FH</sub>, ABCs with DSAs.

Figure S10. Flow cytometry analyses of cT<sub>FH</sub> polarization.

Figure S11. Transcriptional profiling of cT<sub>FH</sub> and ABCs by hierarchical clustering and PCA.

Figure S12. High-dimensional flow cytometry and t-SNE analyses of cT<sub>FH</sub> in individual patients.

Table S1. Patients demographics.

Table S2. Data and assay table.

Table S3. Phenotypic patterns of cT<sub>FH</sub> cell clusters.

Table S4. Impacted canonical pathways in cT<sub>FH</sub> from DSA+ABMR+ versus DSA- patients predicted by Ingenuity Pathway Analysis.

Table S5. Upstream regulators of differentially expressed genes in cT<sub>FH</sub> from DSA+ABMR+ versus DSA- patients predicted by Ingenuity Pathway Analysis.

Table S6. DSA characteristics.

Table S7. Antibodies.

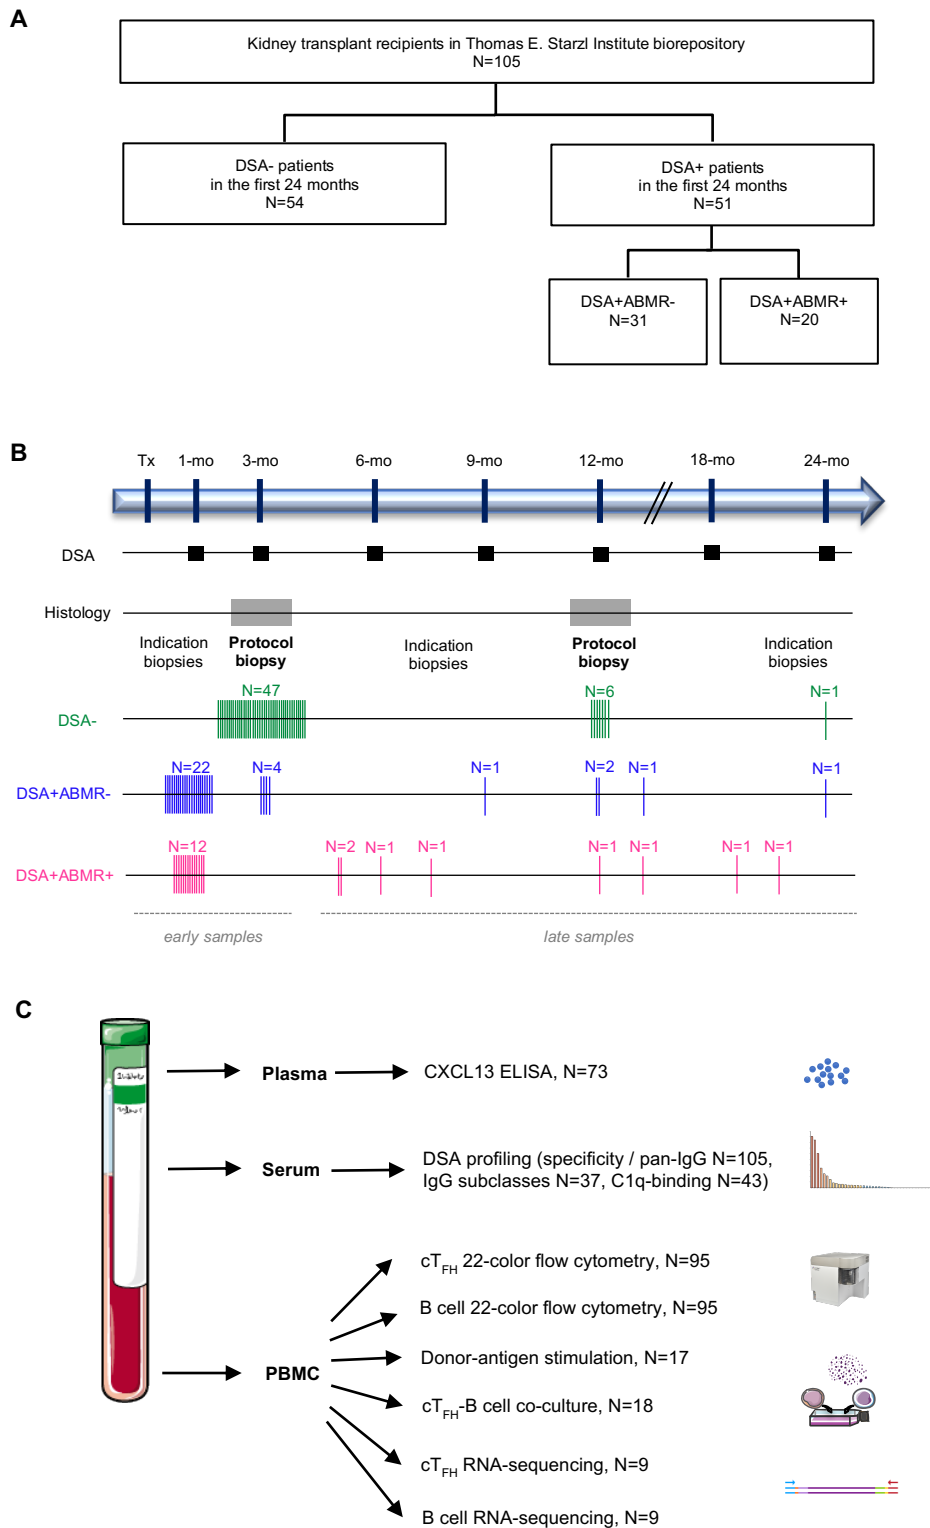

**Figure S1. Study outline and cross-sectional blood samples of kidney transplant patients**  
**(A)** Study design. Identification of three study groups according to the presence of post-transplant DSA and biopsy-proven ABMR status in the first 24 months post-transplant : patients without

DSA nor ABMR (DSA-), patients with DSA without ABMR (DSA+ABMR-) and patients with DSA and ABMR (DSA+ABMR+). **(B)** Schematic representation of the screening strategy of patients for circulating DSAs; at 1-, 3-, 6-, 9-, 12-, 18- and 24-month post-transplant and at the time of indication biopsies. ABMR was detected by kidney allograft protocol and indication biopsies. Cross-sectional time points of blood samples are represented by vertical colored bars. Early samples are defined by samples collected  $\leq$  3-month and late samples are those collected  $>$  3-month post-transplant. **(C)** Sample sizes and assays utilized for multidimensional profiling of cT<sub>FH</sub> and B cell responses in blood of patients.

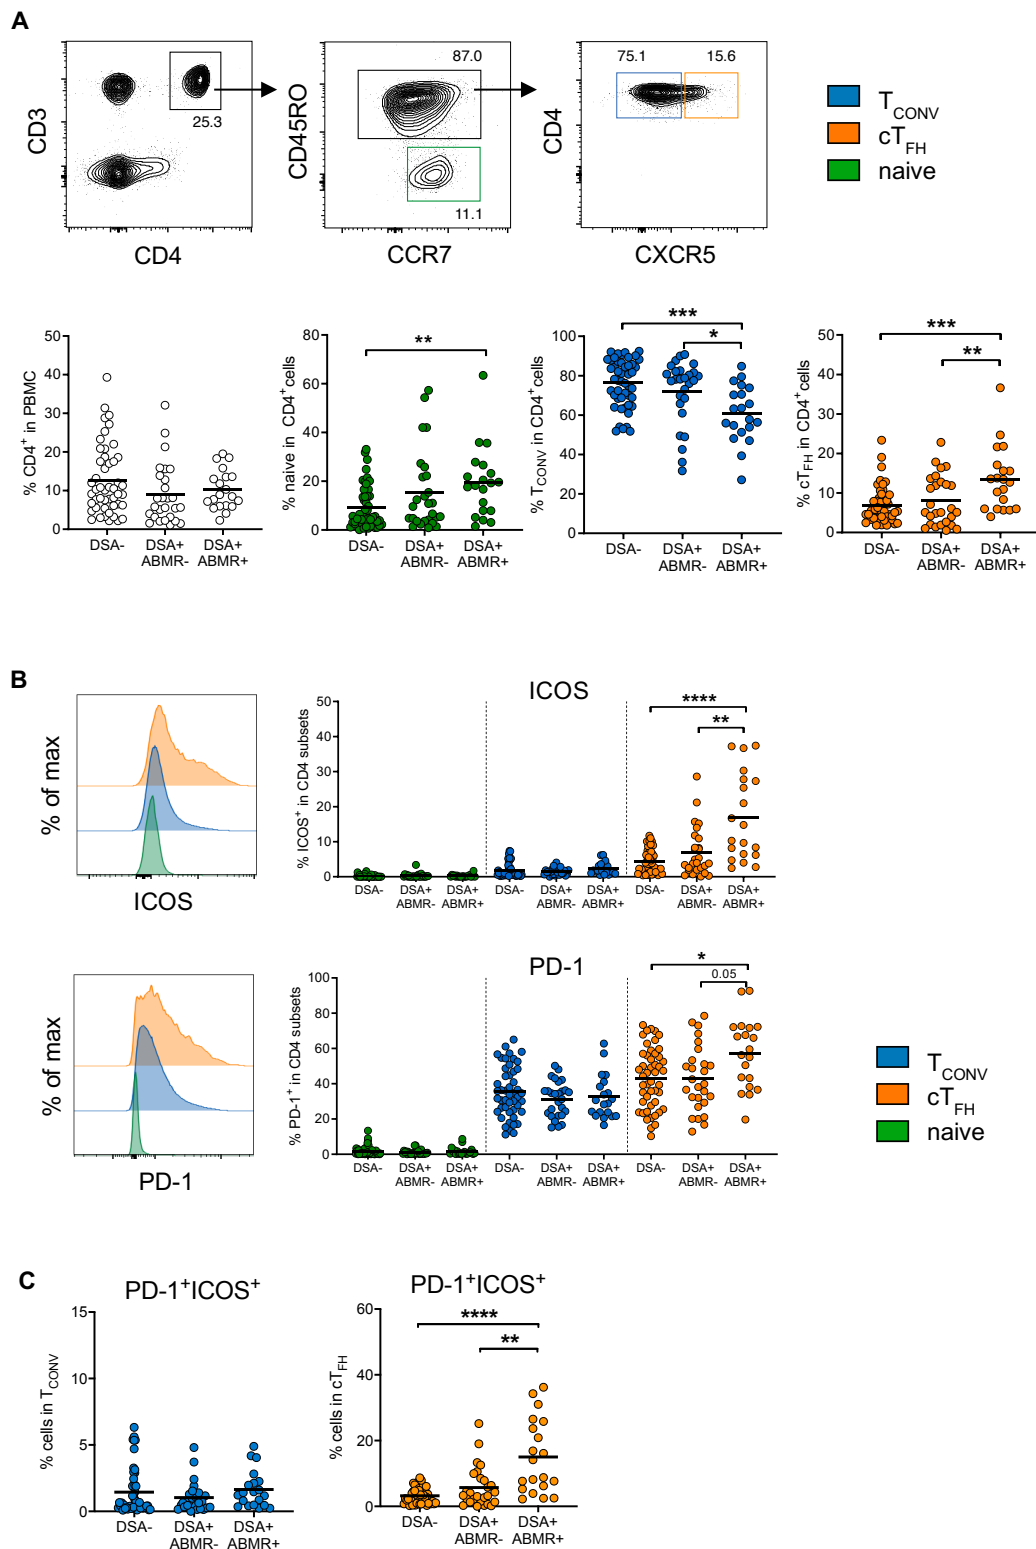

**Figure S2. Flow cytometry analyses of blood CD4<sup>+</sup>T cells**

(A) Representative example of the gating strategy by flow cytometry (upper panel) and dot plots of percentages of CD4, naive, T<sub>CONV</sub> and cT<sub>FH</sub> cells are displayed; DSA- (N=48), DSA+ABMR- (N=27) and DSA+ABMR+ (N=20) (lower panel). (B) Representative histograms and dot plots of



percentages of ICOS and PD-1 in naive, T<sub>CONV</sub> and cT<sub>FH</sub> cells are displayed; DSA- (N=48), DSA+ABMR- (N=27) and DSA+ABMR+ (N=20). **(C)** Dot plots of percentages of PD-1<sup>+</sup>ICOS<sup>+</sup> cells in T<sub>CONV</sub> and cT<sub>FH</sub> are displayed; DSA- (N=48), DSA+ABMR- (N=27) and DSA+ABMR+ (N=20). Kruskal-Wallis with Dunn's post-test for panels **A**, **B** and **C**. \*P < 0.05; \*\*P < 0.01; \*\*\*P < 0.001; \*\*\*\*P < 0.0001. Each dot represents one subject and horizontal lines are mean values.

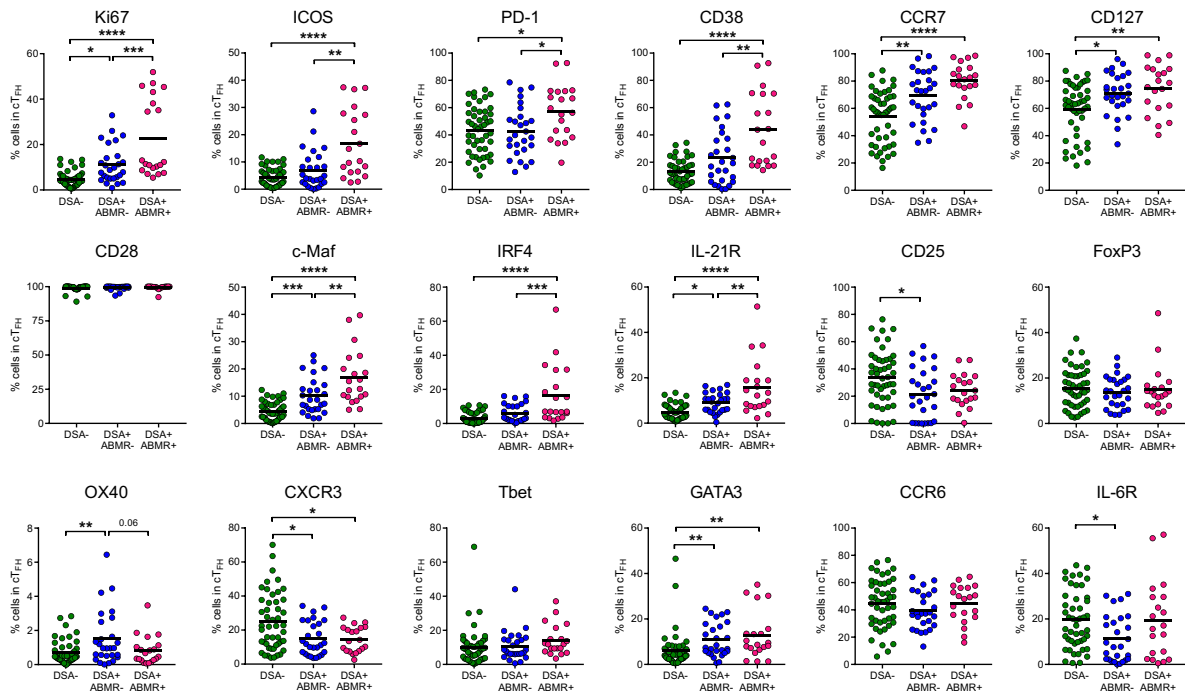

**Figure S3. Biaxial flow cytometry analyses of cTFH**

Dot plots of percentages of indicated marker expression in cTFH by flow cytometry are displayed; DSA- (N=48), DSA+ABMR- (N=27) and DSA+ABMR+ (N=20) patients. One-way ANOVA with Tukey post-test or Kruskal-Wallis with Dunn's post-test. \*P < 0.05; \*\*P < 0.01; \*\*\*P < 0.001; \*\*\*\*P < 0.0001. Each dot represents one subject and horizontal lines are mean values.

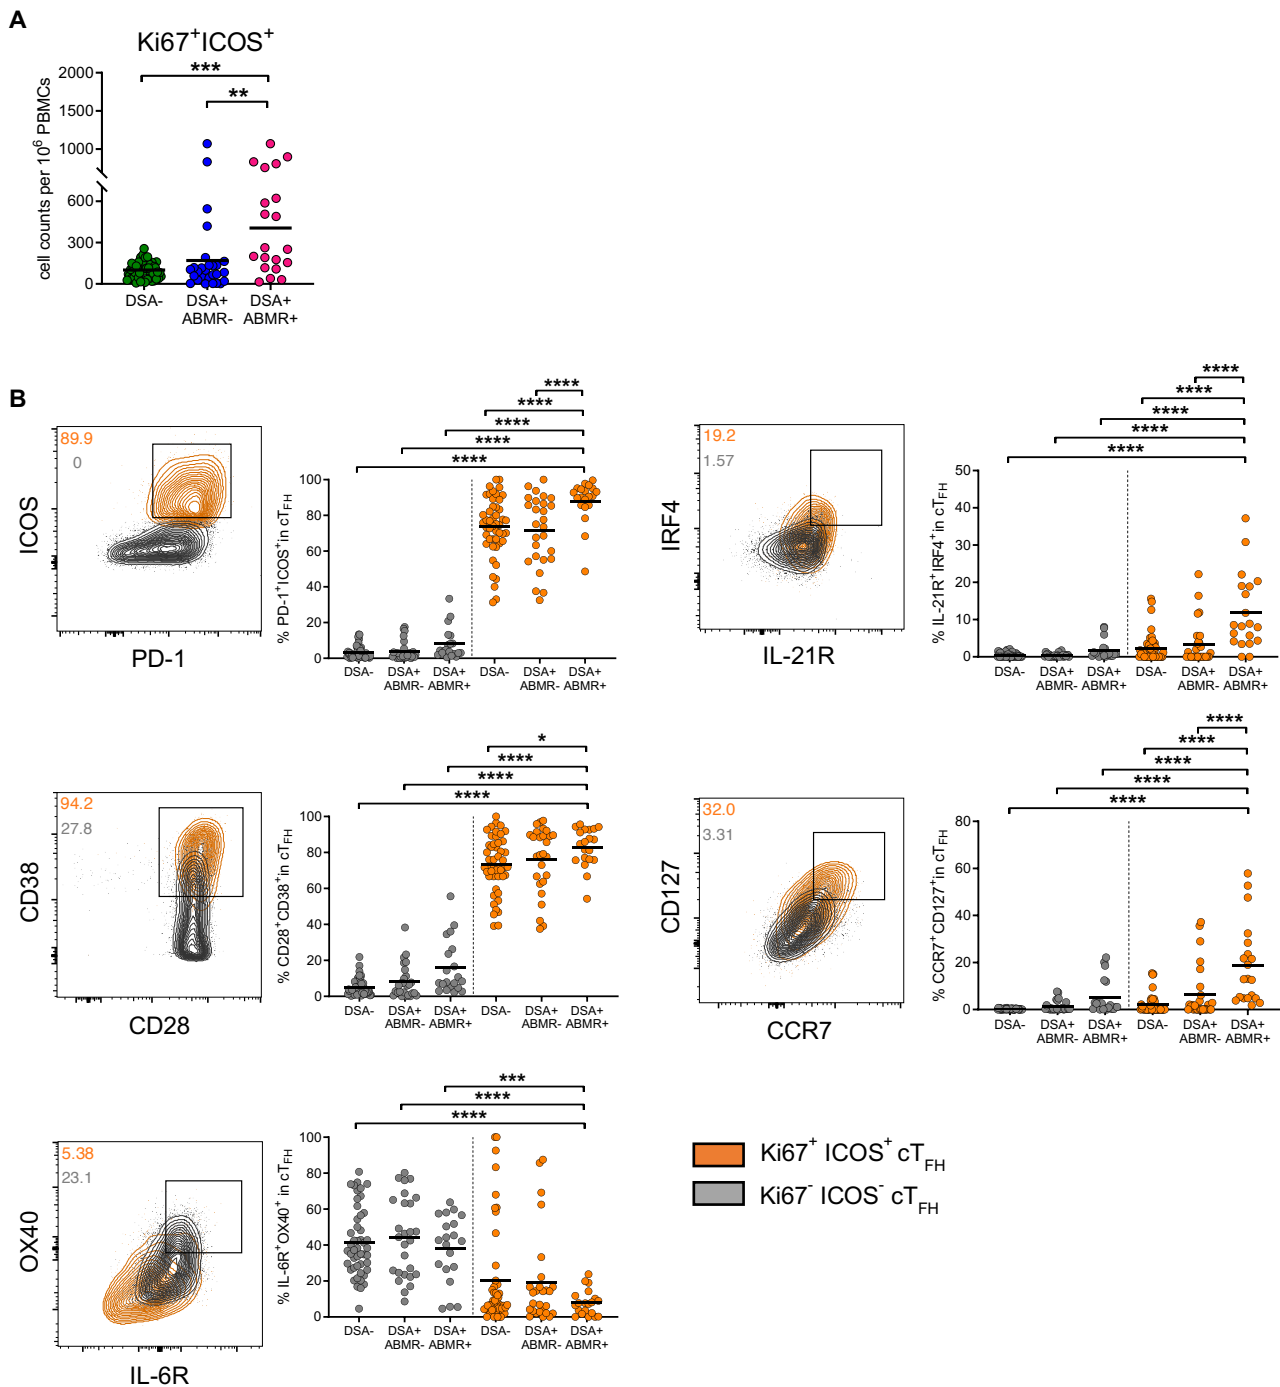

**Figure S4. Biaxial flow cytometry analyses of Ki67<sup>+</sup>ICOS<sup>+</sup> compared to Ki67<sup>-</sup>ICOS<sup>-</sup> cTFH**  
**(A)** Dot plot of Ki67<sup>+</sup>ICOS<sup>+</sup> cTFH as cell counts per million PBMCs by flow cytometry, are displayed; DSA- (N=48), DSA+ABMR- (N=27) and DSA+ABMR+ (N=20) patients. Kruskal-Wallis with Dunn's post-test. **(B)** Representative examples of flow cytometry analysis and dot plots of percentages of indicated marker expression on Ki67<sup>-</sup>ICOS<sup>-</sup> or Ki67<sup>+</sup>ICOS<sup>+</sup> cTFH are displayed; DSA- (N=48), DSA+ABMR- (N=27) and DSA+ABMR+ (N=20). One-way ANOVA with Dunnett post-test. \*P < 0.05; \*\*\*P < 0.001; \*\*\*\*P < 0.0001. Each dot represents one subject and the horizontal lines are the mean values.

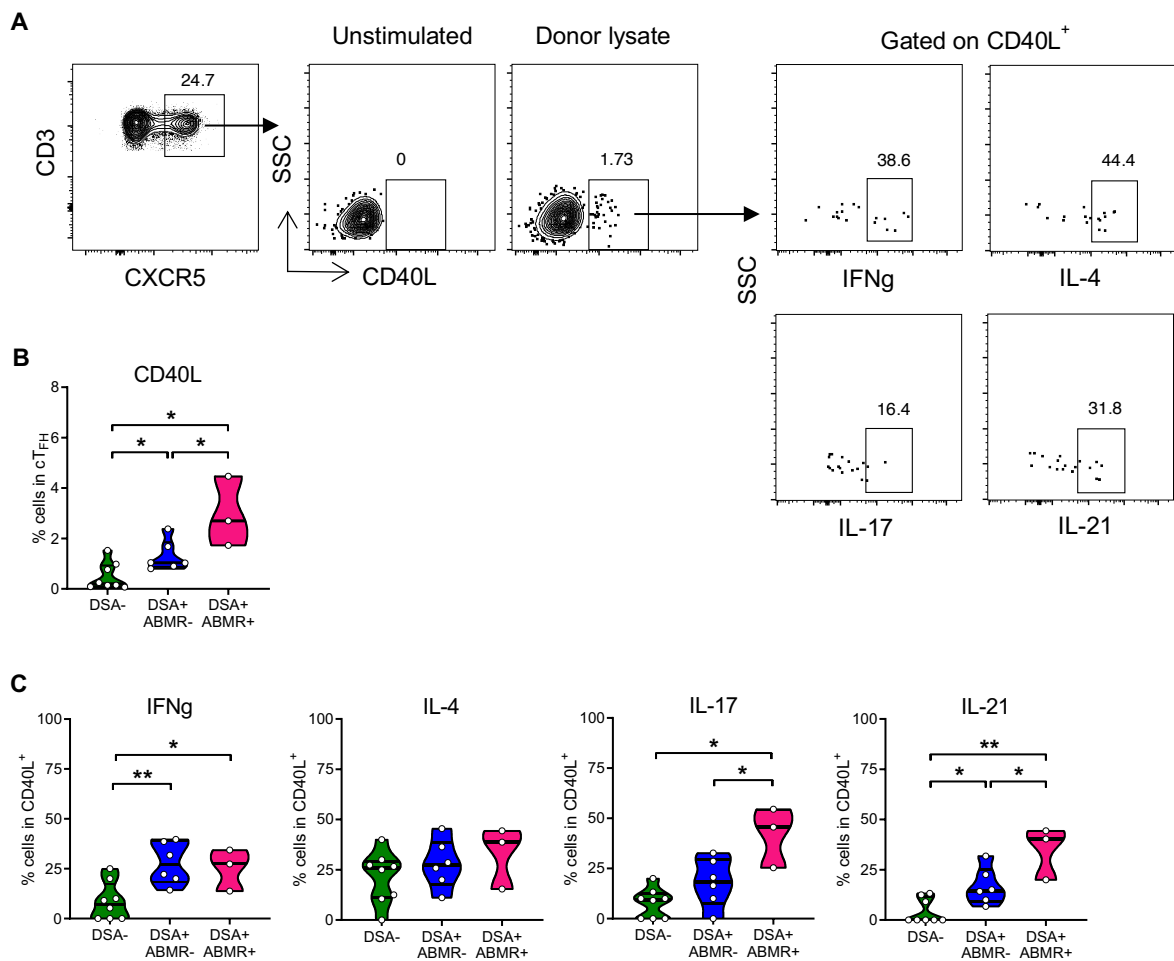

**Figure S5. Flow cytometry analyses of cT<sub>FH</sub> cytokine production in response to donor-antigen stimulation**

Short (6-hour) stimulation of PBMCs from patients pulsed with their donor PBMC lysate. **(A)** Representative example of the gating strategy by flow cytometry to identify CD40L<sup>+</sup> cells in cT<sub>FH</sub> (pre-gated on CD3<sup>+</sup>CD8<sup>+</sup>CXCR5<sup>+</sup>) and cytokines expression among CD40L<sup>+</sup> cells in indicated experimental conditions. **(B-C)** Violin plots of percentages of CD40L<sup>+</sup> cells in cT<sub>FH</sub> and percentages of indicated cytokines expression within CD40L<sup>+</sup> cells are displayed; DSA- (N=8), DSA+ABMR- (N=6) and DSA+ABMR+ (N=3). Unpaired t-test for panels **B** and **C**. \*P < 0.05; \*\*P < 0.01. Each dot represents one subject and horizontal lines of violin plots are the median and quartiles values.

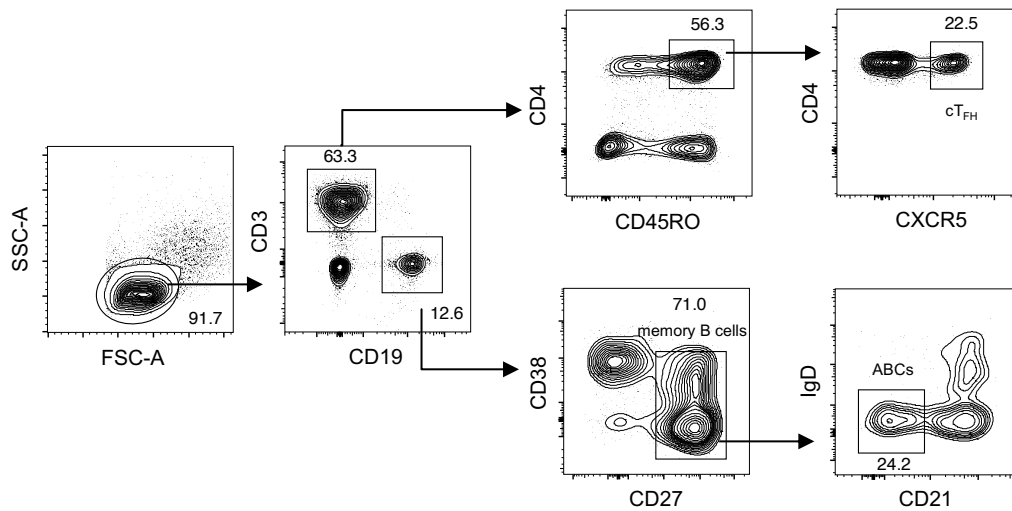

**Figure S6. Gating strategy for sorting cT<sub>FH</sub>, memory B cells and ABCs**

Representative example of the gating strategy for FACS sorting of cT<sub>FH</sub> (CD19<sup>-</sup>CD3<sup>+</sup>CD4<sup>+</sup>CD45RO<sup>+</sup>CXCR5<sup>+</sup>), memory B cells (CD19<sup>+</sup>CD3<sup>-</sup>CD38<sup>lo</sup>CD27<sup>+</sup>) and ABCs (CD19<sup>+</sup>CD3<sup>-</sup>CD38<sup>lo</sup>CD27<sup>+</sup>IgD<sup>-</sup>CD21<sup>lo</sup>) from PBMC samples.

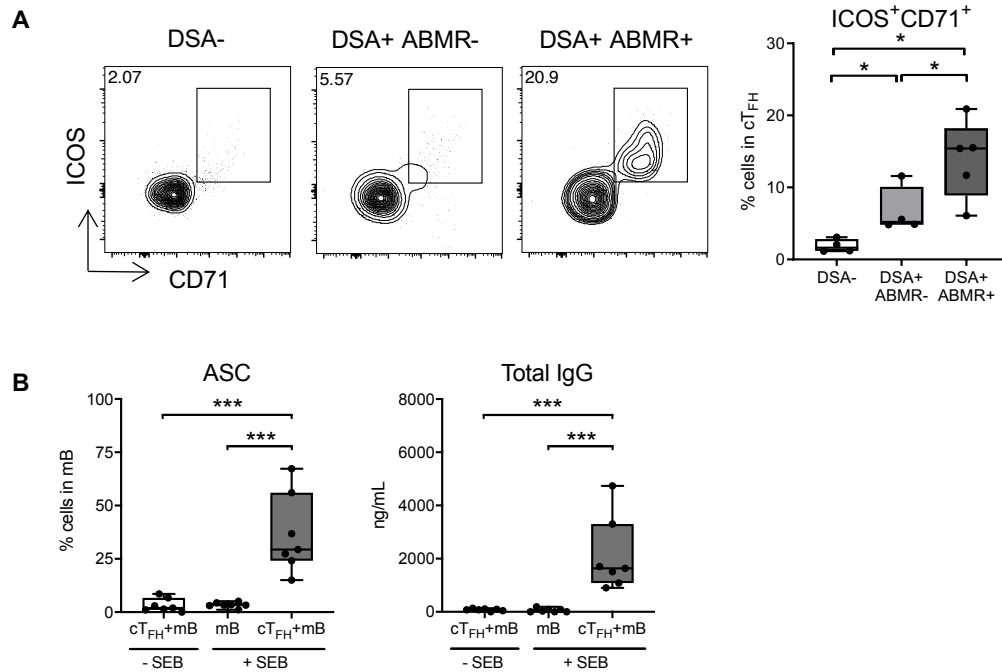

### Figure S7. Co-culture analyses of cTFH with autologous memory B cells

Co-culture of sorted cTFH with autologous memory B cells in presence of SEB (6 days). **(A)** Representative examples of individual experiments by flow cytometry analysis and dot plot of percentages of ICOS<sup>+</sup>CD71<sup>+</sup> cells among cTFH in co-cultures are displayed; DSA- (N=4), DSA+ABMR- (N=4) and DSA+ABMR+ (N=5). **(B)** Dot plots of percentages of CD27<sup>+</sup>CD38<sup>hi</sup> antibody-secreting cells (ASC) in memory B cells and total IgG measured by ELISA in supernatants after 6 days of co-culture in DSA+ABMR+ patients, are displayed; N=7 per condition. Mann-Whitney U test for panel **A** and **B**. \*P < 0.05; \*\*\*P < 0.001.

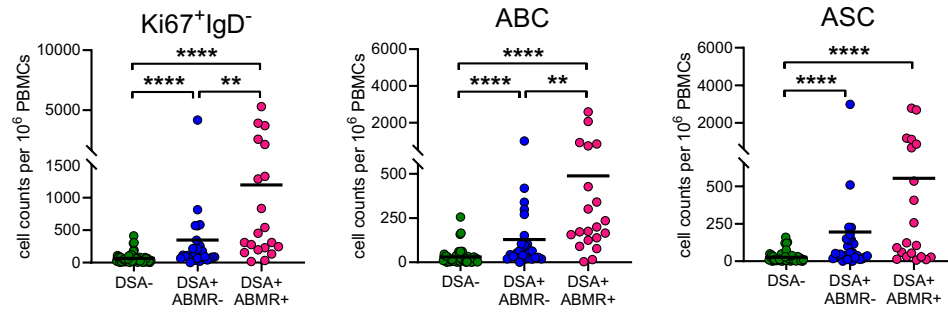

**Figure S8. Flow cytometry analyses of ABCs and ASCs**

Dot plot of Ki67<sup>+</sup>IgD<sup>-</sup>, ABCs and ASCs as cell counts per million PBMCs by flow cytometry, are displayed; DSA- (N=48), DSA+ABMR- (N=27) and DSA+ABMR+ (N=20) patients. Mann-Whitney U test. \*P < 0.05; \*\*P < 0.01; \*\*\*\*P < 0.0001. Each dot represents one subject and the horizontal lines are the mean values.

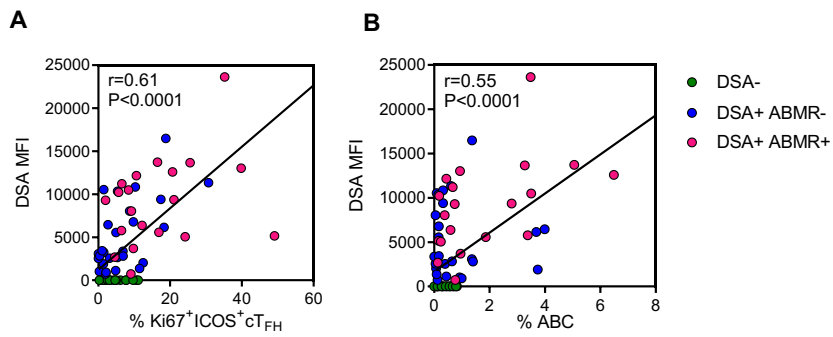

**Figure S9. Correlation of cT<sub>FH</sub>, ABCs with DSAs**

Spearman correlation analysis of Ki67<sup>+</sup>ICOS<sup>+</sup> cT<sub>FH</sub> (A) or ABCs (B) with DSA levels in sera measured by Luminex at the time of flow cytometry analysis, are displayed ; DSA- (N=48), DSA+ABMR- (N=27) and DSA+ABMR+ (N=20) patients.



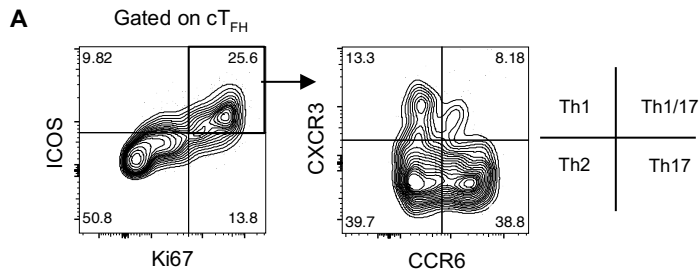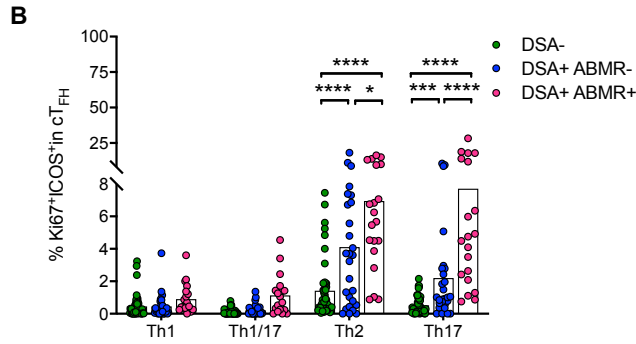

**Figure S10. Flow cytometry analyses of  $cT_{FH}$  polarization**

(A) Representative example of the gating strategy by flow cytometry to identify Th1 ( $CXCR3^+CCR6^-$ ), Th1/17 ( $CXCR3^+CCR6^+$ ), Th2 ( $CXCR3^-CCR6^-$ ) and Th17 ( $CXCR3^-CCR6^+$ ) subsets among  $Ki67^+ICOS^+ cT_{FH}$  is displayed. (B) Percentages of  $Ki67^+ICOS^+$  Th1, Th1/17, Th2 and Th17 cells in  $cT_{FH}$  are displayed; DSA- (N=48), DSA+ABMR- (N=27) and DSA+ABMR+ (N=20). Multiple t-test with Holm-Sidak correction. \* $P < 0.05$ ; \*\* $P < 0.01$ ; \*\*\* $P < 0.001$ ; \*\*\*\* $P < 0.0001$ . Each dot represents one subject and horizontal lines are mean values.

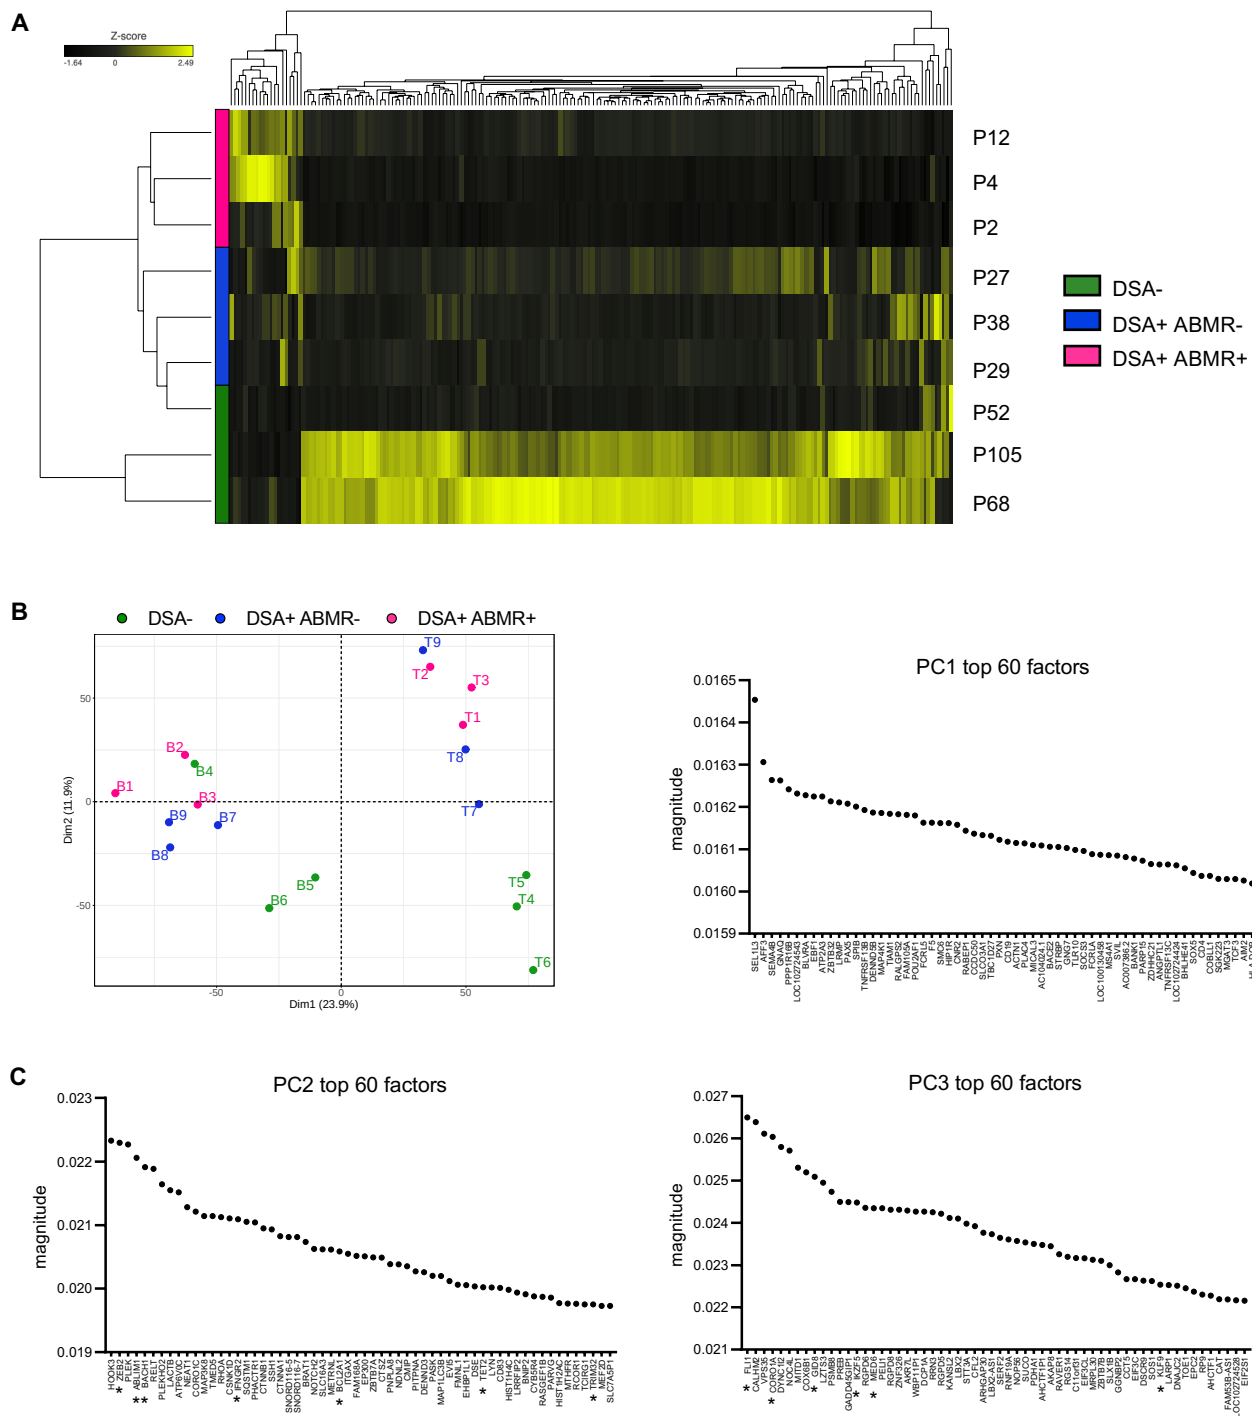

**Figure S11. Transcriptional profiling of  $cT_{FH}$  and ABCs by hierarchical clustering and PCA**  
 RNA-seq analysis of sorted  $cT_{FH}$  and ABCs in three patient groups; DSA- (N=3), DSA+ABMR- (N=3) and DSA+ABMR+ (N=3). **(A)** Heatmap generated by hierarchical clustering of genes expressed in ABCs and the three types of patient samples. Genes used for clustering were differentially expressed (fold change >2, false discovery rate P-Value <0.05). **(B)** PCA of the  $cT_{FH}$  and ABC RNA-seq patterns for each patient group (N=3 patients per group). PC1 and PC2 delineated the  $cT_{FH}$  (T1-9) and ABCs (B1-9) from DSA- (green), DSA+ABMR- (blue) and

DSA+ABMR+ (pink) patients as separate clusters (left panel). Top 60 genes as factors contributing to PC1, aligned by magnitude. (right panel). (C) Top 60 genes as factors contributing to PC2 and PC3, aligned by magnitude. \* refers to selected genes displayed in **Figure 6B**.

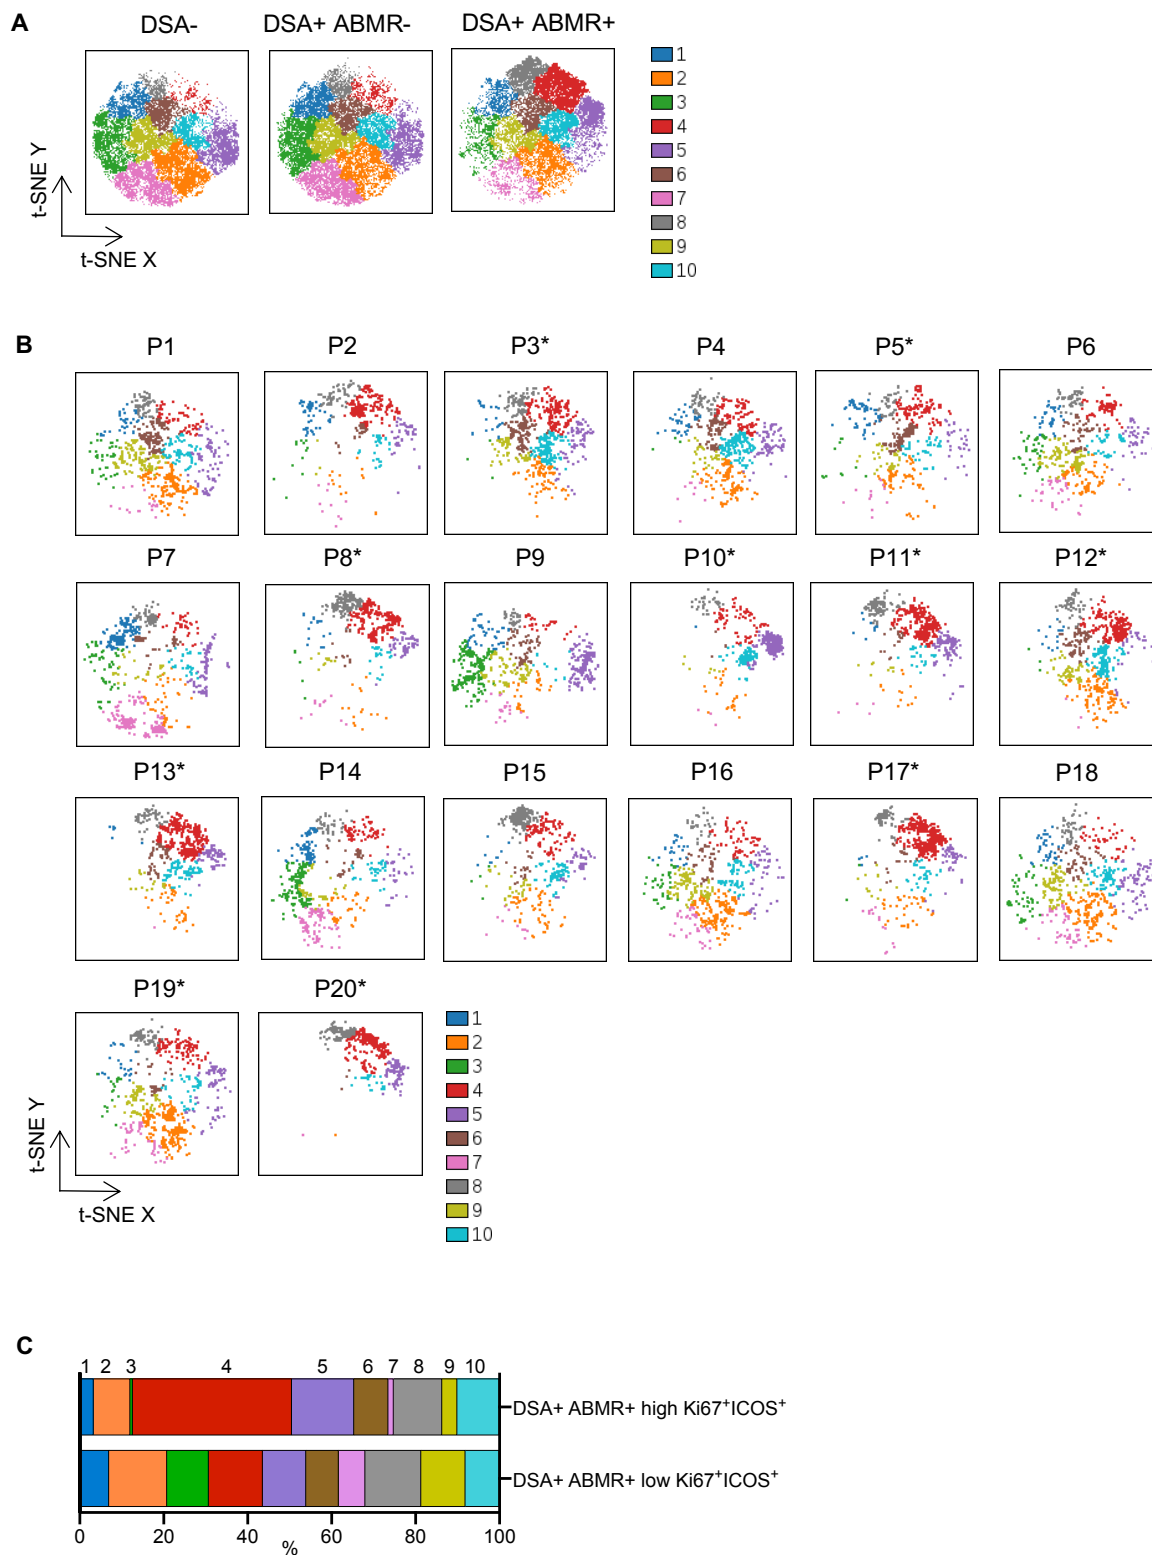

**Figure S12. High-dimensional flow cytometry and t-SNE analyses of cT<sub>FH</sub> in individual patients**

(A) t-SNE projections of cT<sub>FH</sub> cells were generated using N=18,700 cells from each patient group and were overlaid with 10 cT<sub>FH</sub> cell clusters delineated by SPADE clustering (as in **Figure 1C**);

DSA- (N=20), DSA+ABMR- (N=20) and DSA+ABMR+ (N=20) patients. **(B)** t-SNE projections of cT<sub>FH</sub> cells generated for individual patients (N=20) from DSA+ABMR+ group. Each t-SNE map is based on N=935 cells. \* indicates the 10 patients from the DSA+ABMR+ high Ki67<sup>+</sup>ICOS<sup>+</sup> subgroup as in **Figure 8**. **(C)** Stacked bar plot showing cT<sub>FH</sub> cell cluster distribution based on SPADE clustering as in panel **B**. Cluster 4 is significantly different in proportion across the indicated groups, by Mann-Whitney U test.

**Table S1. Patients demographics**

|                                                                         | DSA-          | DSA+<br>ABMR- | DSA+<br>ABMR+ | P value**** |
|-------------------------------------------------------------------------|---------------|---------------|---------------|-------------|
|                                                                         | N=54          | N=31          | N=20          |             |
| <b>Characteristics at the time of transplantation</b>                   |               |               |               |             |
| Recipient age (years), mean ± SD                                        | 49.9 ±13.2    | 46.7 ±14.5    | 45.3 ±15.1    | 0.358       |
| Recipient male sex, n(%)                                                | 39 (72.2)     | 17 (54.8)     | 11 (55.0)     | 0.182       |
| Caucasian, n(%)                                                         | 49 (90.7)     | 27 (87.1)     | 15 (75.0)     | 0.208       |
| Retransplantation, n(%)                                                 | 4 (7.4)       | 7 (22.6)      | 8 (40)        | 0.004       |
| Time in dialysis (months), mean ± SD                                    | 23.6 ± 28.1   | 41.4 ± 48.0   | 37.0 ± 28.8   | 0.064       |
| Native kidney disease, n(%)                                             |               |               |               |             |
| Glomerular*                                                             | 10 (18.5)     | 11 (35.5)     | 5 (25.0)      | 0.218       |
| Hypertensive                                                            | 6 (11.1)      | 3 (9.7)       | 4 (20.0)      | 0.507       |
| Tubulointerstitial nephropathy                                          | 1 (1.8)       | 3 (9.7)       | 1 (5.0)       | 0.264       |
| Polycystic kidney disease                                               | 10 (18.5)     | 5 (16.1)      | 2 (10.0)      | 0.677       |
| Diabetes                                                                | 13 (24.1)     | 3 (9.7)       | 5 (25.0)      | 0.230       |
| Other nephropathy**                                                     | 13 (24.1)     | 7 (22.6)      | 5 (25.0)      | 0.979       |
| Donor age (year), mean ± SD                                             | 43.9 ±11.7    | 39.3 ±15.3    | 39.4 ±13.7    | 0.223       |
| Donor male sex, n(%)                                                    | 23 (42.6)     | 17 (54.8)     | 10 (50.0)     | 0.538       |
| Living donor, n(%)                                                      | 28 (51.8)     | 13 (41.9)     | 5 (25.0)      | 0.114       |
| Cold ischemia time (min), mean ± SD                                     | 297.3 ± 371.7 | 440.7 ± 395.4 | 417.4 ± 299.3 | 0.174       |
| Thymoglobulin induction therapy, n(%)                                   | 54 (100)      | 31 (100)      | 20 (100)      | –           |
| Negative flow cytometry crossmatch, n(%)                                | 54 (100)      | 31 (100)      | 20 (100)      | –           |
| HLA mismatches, mean ± SD***                                            | 4.9 ± 1.9     | 5.0 ± 2.1     | 5.0 ± 2.0     | 0.981       |
| <b>Characteristics at the time of cross-sectional sample collection</b> |               |               |               |             |
| Time to transplantation (months), mean ± SEM                            | 4.3 ± 0.4     | 3.6 ± 1.0     | 5.3 ± 1.4     | 0.439       |
| TCMR lesions at the time of sample collection, n(%)                     | 0 (0)         | 0 (0)         | 17 (85)       | <0.0001     |
| Tacrolimus, n(%)                                                        | 53 (98.1)     | 31 (100)      | 18 (90.0)     | 0.091       |
| Tacrolimus trough level (µg/L), mean ± SD                               | 9.6 ± 2.8     | 9.1 ± 3.0     | 8.8 ± 5.3     | 0.614       |
| Mycophenolate mofetil, n(%)                                             | 54 (100)      | 31 (100)      | 20 (100)      | –           |

ABMR, antibody-mediated rejection ; DSA, donor-specific antibody ; HLA, human leukocyte antigen ; TCMR, T-cell mediated rejection

\*Glomerulonephritis includes chronic glomerulonephritis, crescentic glomerulonephritis, focal segmental glomerulosclerosis, Wegener's granulomatosis, IgA nephropathy, membranous nephropathy

\*\*other nephropathy includes familial nephropathy, renal hypoplasia and other noncategorized conditions

\*\*\*HLA mismatches at A, B, DR and DQ locus

\*\*\*\*One-way ANOVA and chi-squared test were used for statistical comparison of continuous and categorical variables, respectively

**Table S2. Data and assay table**

| Patients | Patient groups | Cross-sectional cT <sub>H</sub> flow cytometry |                         | Cross-sectional B cells flow cytometry |                |                | ABC RNA-seq | cT <sub>H</sub> -mB cells co-culture |                             | Serum DSA profiling |                |             | Plasma CXCL13 ELISA (pg/mL) | Donor-antigen stimulation | Longitudinal cT <sub>H</sub> -B cells flow cytometry |
|----------|----------------|------------------------------------------------|-------------------------|----------------------------------------|----------------|----------------|-------------|--------------------------------------|-----------------------------|---------------------|----------------|-------------|-----------------------------|---------------------------|------------------------------------------------------|
|          |                | % Ki67+ICOS+ in cT <sub>H</sub>                | cT <sub>H</sub> RNA-seq | % Ki67+IgD- in CD27+                   | % ABC in CD27+ | % ASC in CD27+ |             | ASC at 6 days (cell counts)          | Total IgG at 6 days (ng/mL) | Specificity Pan-IgG | IgG subclasses | C1q-binding |                             |                           |                                                      |
|          |                |                                                |                         |                                        |                |                |             |                                      |                             |                     |                |             |                             |                           |                                                      |
| P1       | DSA+ABMR+      | 4.56 %                                         |                         | 0.28 %                                 | 0.13%          | 0.06%          |             |                                      |                             | X                   | X              | X           | 32                          |                           |                                                      |
| P2       | DSA+ABMR+      | 6.44 %                                         | X                       | 5.17 %                                 | 3.38%          | 1.63%          | X           | 5513                                 | 4739                        | X                   | X              | X           | 63                          |                           |                                                      |
| P3       | DSA+ABMR+      | 16.5 %                                         |                         | 9.00 %                                 | 5.06%          | 3.55%          |             |                                      |                             | X                   | X              | X           | 75                          |                           |                                                      |
| P4       | DSA+ABMR+      | 8.45 %                                         | X                       | 9.01 %                                 | 3.50%          | 4.73%          | X           |                                      |                             | X                   | X              | X           | 58                          |                           |                                                      |
| P5       | DSA+ABMR+      | 21.1 %                                         |                         | 7.60 %                                 | 2.80%          | 3.60%          |             |                                      |                             | X                   | X              | X           | 36                          |                           | X                                                    |
| P6       | DSA+ABMR+      | 9.78 %                                         |                         | 1.74 %                                 | 0.95%          | 0.46%          |             | 2803                                 | 1635                        | X                   |                | X           | 46                          |                           | X                                                    |
| P7       | DSA+ABMR+      | 9.08 %                                         |                         | 1.53 %                                 | 0.76%          | 0.50%          |             |                                      |                             | X                   |                |             | 52                          |                           |                                                      |
| P8       | DSA+ABMR+      | 20.7 %                                         |                         | 15.1 %                                 | 6.49%          | 8.38%          |             |                                      |                             | X                   | X              | X           | 28                          |                           | X                                                    |
| P9       | DSA+ABMR+      | 9.23 %                                         |                         | 0.51 %                                 | 0.38%          | 0.03%          |             |                                      |                             | X                   | X              | X           | 83                          | X                         |                                                      |
| P10      | DSA+ABMR+      | 49.1 %                                         |                         | 0.28 %                                 | 0.16%          | 0.05%          |             | 6130                                 | 3301.9                      | X                   | X              | X           | 259                         |                           |                                                      |
| P11      | DSA+ABMR+      | 24.2 %                                         |                         | 2.07 %                                 | 0.24%          | 0.54%          |             |                                      |                             | X                   | X              | X           | 143                         | X                         |                                                      |
| P12      | DSA+ABMR+      | 16.9 %                                         | X                       | 9.35 %                                 | 1.86%          | 6.80%          | X           | 1732                                 | 1705                        | X                   | X              | X           | 259                         |                           |                                                      |
| P13      | DSA+ABMR+      | 39.8 %                                         |                         | 3.31 %                                 | 0.93%          | 2.12%          |             |                                      |                             | X                   | X              | X           | 127                         |                           |                                                      |
| P14      | DSA+ABMR+      | 5.67 %                                         |                         | 1.01 %                                 | 0.18%          | 0.64%          |             |                                      |                             | X                   | X              | X           | 28                          |                           |                                                      |
| P15      | DSA+ABMR+      | 10.6 %                                         |                         | 0.77 %                                 | 0.44%          | 0.31%          |             |                                      |                             | X                   | X              | X           | 35                          |                           |                                                      |
| P16      | DSA+ABMR+      | 6.57 %                                         |                         | 1.26 %                                 | 0.67%          | 0.42%          |             | 2069                                 | 1512                        | X                   | X              | X           | 15                          |                           |                                                      |
| P17      | DSA+ABMR+      | 35.2 %                                         |                         | 5.26 %                                 | 3.48%          | 1.51%          |             | 7061                                 | 1082                        | X                   | X              | X           | 32                          | X                         | X                                                    |
| P18      | DSA+ABMR+      | 2.01 %                                         |                         | 1.06 %                                 | 0.74%          | 0.06%          |             | 2548                                 | 902                         | X                   | X              | X           | 45                          |                           |                                                      |
| P19      | DSA+ABMR+      | 12.2 %                                         |                         | 0.75 %                                 | 0.59%          | 0.11%          |             |                                      |                             | X                   | X              | X           | 27                          |                           |                                                      |
| P20      | DSA+ABMR+      | 25.6 %                                         |                         | 10.2 %                                 | 3.27%          | 6.68%          |             |                                      |                             | X                   | X              | X           | 470                         |                           |                                                      |
| P21      | DSA+ABMR-      | 0.28 %                                         |                         | 2.44 %                                 | 0.92%          | 1.28%          |             |                                      |                             | X                   |                | X           | 37                          |                           |                                                      |
| P22      | DSA+ABMR-      |                                                |                         |                                        |                |                |             |                                      |                             | X                   |                |             |                             | X                         |                                                      |
| P23      | DSA+ABMR-      | 17.4 %                                         |                         | 0.89 %                                 | 0.32%          | 0.46%          |             | 983                                  | 861                         | X                   | X              | X           |                             |                           |                                                      |
| P24      | DSA+ABMR-      |                                                |                         |                                        |                |                |             | 382                                  | 159.5                       | X                   |                |             |                             | X                         |                                                      |
| P25      | DSA+ABMR-      | 30.7 %                                         |                         | 1.21 %                                 | 0.61%          | 0.52%          |             |                                      |                             | X                   | X              | X           | 70                          |                           |                                                      |
| P26      | DSA+ABMR-      |                                                |                         |                                        |                |                |             |                                      |                             | X                   |                |             |                             | X                         |                                                      |
| P27      | DSA+ABMR-      | 0.043 %                                        | X                       | 1.85 %                                 | 1.36%          | 0.38%          | X           |                                      |                             | X                   | X              | X           |                             | X                         | X                                                    |
| P28      | DSA+ABMR-      | 1.49 %                                         |                         | 0.13 %                                 | 0.09%          | 0.02%          |             |                                      |                             | X                   | X              | X           | 18                          |                           |                                                      |
| P29      | DSA+ABMR-      | 1.99 %                                         | X                       | 0.19 %                                 | 0.12%          | 0.05%          | X           |                                      |                             | X                   |                |             | 33                          |                           |                                                      |
| P30      | DSA+ABMR-      | 5.29 %                                         |                         | 0.16 %                                 | 0.14%          | 0.00%          |             |                                      |                             | X                   | X              | X           | 24                          |                           |                                                      |
| P31      | DSA+ABMR-      | 4.94 %                                         |                         | 0.25 %                                 | 0.16%          | 0.08%          |             | 211                                  | 400.1                       | X                   | X              | X           | 7                           |                           |                                                      |
| P32      | DSA+ABMR-      | 5.35 %                                         |                         | 0.24 %                                 | 0.15%          | 0.05%          |             |                                      |                             | X                   | X              | X           | 21                          |                           |                                                      |
| P33      | DSA+ABMR-      | 18.8 %                                         |                         | 2.35 %                                 | 1.37%          | 0.90%          |             |                                      |                             | X                   | X              | X           | 259                         |                           | X                                                    |
| P34      | DSA+ABMR-      | 1.41 %                                         |                         | 15.5 %                                 | 3.74%          | 11.08 %        |             | 1680                                 | 193                         | X                   | X              | X           | 135                         |                           |                                                      |
| P35      | DSA+ABMR-      |                                                |                         |                                        |                |                |             |                                      |                             | X                   |                |             |                             | X                         | X                                                    |
| P36      | DSA+ABMR-      | 1.49 %                                         |                         | 0.22 %                                 | 0.13%          | 0.07%          |             |                                      |                             | X                   |                | X           | 50                          |                           |                                                      |
| P37      | DSA+ABMR-      | 12.5 %                                         |                         | 0.14 %                                 | 0.07%          | 0.05%          |             |                                      |                             | X                   |                | X           | 44                          |                           |                                                      |
| P38      | DSA+ABMR-      | 2.68 %                                         | X                       | 7.63 %                                 | 3.99%          | 3.02%          | X           | 655                                  | 1341.8                      | X                   | X              | X           | 60                          |                           | X                                                    |
| P39      | DSA+ABMR-      | 0 %                                            |                         | 1.04 %                                 | 0.39%          | 0.41%          |             |                                      |                             | X                   | X              | X           | 29                          | X                         | X                                                    |
| P40      | DSA+ABMR-      | 9.76 %                                         |                         | 1.39 %                                 | 0.17%          | 1.10%          |             |                                      |                             | X                   | X              | X           | 25                          |                           |                                                      |

|     |           |        |   |         |       |       |   |      |       |   |   |   |     |  |   |
|-----|-----------|--------|---|---------|-------|-------|---|------|-------|---|---|---|-----|--|---|
| P41 | DSA+ABMR- | 2.16 % |   | 3.37 %  | 0.99% | 2.16% |   |      |       | X |   |   | 200 |  |   |
| P42 | DSA+ABMR- | 4.81 % |   | 0.75 %  | 0.44% | 0.23% |   |      |       | X |   |   | 37  |  | X |
| P43 | DSA+ABMR- | 3.16 % |   | 0.23 %  | 0.05% | 0.12% |   |      |       | X | X | X | 17  |  |   |
| P44 | DSA+ABMR- | 0.39 % |   | 1.30 %  | 0.64% | 0.35% |   |      |       | X | X | X | 18  |  | X |
| P45 | DSA+ABMR- | 6.85 % |   | 0 %     | 0.00% | 0.00% |   | 894  | 186   | X | X | X | 34  |  |   |
| P46 | DSA+ABMR- | 1.06 % |   | 0.38 %  | 0.17% | 0.15% |   |      |       | X |   | X | 19  |  |   |
| P47 | DSA+ABMR- | 10.3 % |   | 1.08 %  | 0.32% | 0.75% |   |      |       | X | X | X | 44  |  |   |
| P48 | DSA+ABMR- | 6.88 % |   | 3.20 %  | 1.40% | 1.65% |   |      |       | X | X | X | 39  |  |   |
| P49 | DSA+ABMR- | 8.71 % |   | 0.077 % | 0.05% | 0.02% |   |      |       | X | X | X | 132 |  |   |
| P50 | DSA+ABMR- | 18.3 % |   | 11.1 %  | 3.69% | 6.95% |   |      |       | X | X | X | 25  |  |   |
| P51 | DSA+ABMR- | 11.5 % |   | 0.24 %  | 0.09% | 0.13% |   |      |       | X |   | X | 11  |  |   |
| P52 | DSA-      | 1.88 % | X | 1.06 %  | 0.82% | 0.22% | X | 25   | 325   | X |   |   | 28  |  | X |
| P53 | DSA-      | 1.99 % |   | 0.072 % | 0.06% | 0.01% |   |      |       | X |   |   | 12  |  |   |
| P54 | DSA-      | 2.28 % |   | 1.12 %  | 0.58% | 0.55% |   |      |       | X |   |   | 29  |  |   |
| P55 | DSA-      | 2.83 % |   | 0.16 %  | 0.09% | 0.07% |   |      |       | X |   |   |     |  |   |
| P56 | DSA-      | 0.52 % |   | 0.35 %  | 0.16% | 0.12% |   |      |       | X |   |   | 20  |  |   |
| P57 | DSA-      | 6.16 % |   | 0       | 0.00% | 0.00% |   |      |       | X |   |   | 51  |  |   |
| P58 | DSA-      | 1.40 % |   | 0.74 %  | 0.33% | 0.31% |   |      |       | X |   |   | 16  |  |   |
| P59 | DSA-      | 0.73 % |   | 0.32 %  | 0.12% | 0.17% |   |      |       | X |   |   |     |  |   |
| P60 | DSA-      | 1.18 % |   | 0.46 %  | 0.28% | 0.18% |   |      |       | X |   |   |     |  |   |
| P61 | DSA-      | 2.91 % |   | 0.084 % | 0.03% | 0.05% |   |      |       | X |   |   | 21  |  |   |
| P62 | DSA-      | 7.75 % |   | 0.17 %  | 0.17% | 0.00% |   |      |       | X |   |   |     |  |   |
| P63 | DSA-      | 0.27 % |   | 0.76 %  | 0.47% | 0.22% |   |      |       | X |   |   | 36  |  | X |
| P64 | DSA-      | 0.52 % |   | 0.082 % | 0.04% | 0.03% |   |      |       | X |   |   |     |  |   |
| P65 | DSA-      | 4.98 % |   | 0.42 %  | 0.15% | 0.19% |   |      |       | X |   |   | 20  |  |   |
| P66 | DSA-      | 1.06 % |   | 0.073 % | 0.03% | 0.04% |   |      |       | X |   |   | 22  |  |   |
| P67 | DSA-      | 2.33 % |   | 0.30 %  | 0.15% | 0.08% |   |      |       | X |   |   | 28  |  |   |
| P68 | DSA-      | 0.41 % | X | 0.00874 | 0.47% | 0.38% | X | 1302 | 806.8 | X |   |   |     |  | X |
| P69 | DSA-      | 10.6 % |   | 0.60 %  | 0.27% | 0.28% |   |      |       | X |   |   | 29  |  |   |
| P70 | DSA-      | 0.26 % |   | 0.098 % | 0.03% | 0.04% |   |      |       | X |   |   |     |  |   |
| P71 | DSA-      | 0.76 % |   | 1.27 %  | 0.72% | 0.47% |   |      |       | X |   |   |     |  |   |
| P72 | DSA-      | 1.22 % |   | 0.063 % | 0.04% | 0.01% |   |      |       | X |   |   | 35  |  |   |
| P73 | DSA-      | 2.22 % |   | 0.47 %  | 0.06% | 0.31% |   |      |       | X |   |   | 21  |  |   |
| P74 | DSA-      | 1.01 % |   | 0.094 % | 0.04% | 0.02% |   |      |       | X |   |   | 32  |  |   |
| P75 | DSA-      |        |   |         |       |       |   |      |       | X |   |   |     |  | X |
| P76 | DSA-      | 4.34 % |   | 0.0005  | 0.00% | 0.04% |   |      |       | X |   |   | 88  |  |   |
| P77 | DSA-      | 1.89 % |   | 0.35 %  | 0.10% | 0.10% |   |      |       | X |   |   | 26  |  |   |
| P78 | DSA-      | 2.28 % |   | 0.10 %  | 0.07% | 0.02% |   |      |       | X |   |   | 24  |  |   |
| P79 | DSA-      | 0.11 % |   | 0.45 %  | 0.10% | 0.31% |   |      |       | X |   |   |     |  |   |
| P80 | DSA-      | 1.87 % |   | 0.43 %  | 0.17% | 0.24% |   |      |       | X |   |   | 15  |  |   |
| P81 | DSA-      | 0.26 % |   | 0.20 %  | 0.10% | 0.10% |   |      |       | X |   |   | 18  |  |   |
| P82 | DSA-      | 0.93 % |   | 0.053 % | 0.00% | 0.00% |   |      |       | X |   |   | 7   |  |   |
| P83 | DSA-      | 2.94 % |   | 0.11 %  | 0.05% | 0.05% |   |      |       | X |   |   | 27  |  |   |
| P84 | DSA-      | 0.52 % |   | 0.25 %  | 0.16% | 0.04% |   |      |       | X |   |   | 15  |  |   |
| P85 | DSA-      | 7.70 % |   | 0.066 % | 0.04% | 0.02% |   |      |       | X |   |   | 29  |  |   |
| P86 | DSA-      | 2.53 % |   | 0.12 %  | 0.06% | 0.05% |   |      |       | X |   |   | 13  |  |   |
| P87 | DSA-      | 11.1 % |   | 1.13 %  | 0.42% | 0.59% |   |      |       | X |   |   |     |  |   |
| P88 | DSA-      | 0.48 % |   | 0.62 %  | 0.55% | 0.04% |   |      |       | X |   |   | 11  |  | X |
| P89 | DSA-      | 0.79 % |   | 1.25 %  | 0.67% | 0.31% |   |      |       | X |   |   |     |  |   |
| P90 | DSA-      | 3.27 % |   | 0.74 %  | 0.25% | 0.41% |   |      |       | X |   |   | 25  |  |   |
| P91 | DSA-      | 1.83 % |   | 0.30 %  | 0.09% | 0.13% |   |      |       | X |   |   |     |  |   |
| P92 | DSA-      | 0.49 % |   | 0.35 %  | 0.13% | 0.02% |   |      |       | X |   |   |     |  |   |
| P93 | DSA-      | 3.10 % |   | 0.018 % | 0.00% | 0.01% |   |      |       | X |   |   |     |  |   |
| P94 | DSA-      | 0.37 % |   | 0.032 % | 0.01% | 0.01% |   |      |       | X |   |   |     |  |   |
| P95 | DSA-      | 3.28 % |   | 0.21 %  | 0.07% | 0.13% |   |      |       | X |   |   |     |  | X |



|      |      |        |   |         |       |       |   |      |        |   |  |  |    |   |   |
|------|------|--------|---|---------|-------|-------|---|------|--------|---|--|--|----|---|---|
| P96  | DSA- |        |   |         |       |       |   | 607  | 349    | X |  |  |    | X |   |
| P97  | DSA- | 0.44 % |   | 0.040 % | 0.00% | 0.02% |   |      |        | X |  |  | 34 | X |   |
| P98  | DSA- |        |   |         |       |       |   | 384  | 257.7  | X |  |  |    | X |   |
| P99  | DSA- | 9.65 % |   | 0.15 %  | 0.06% | 0.05% |   |      |        | X |  |  |    |   |   |
| P100 | DSA- |        |   |         |       |       |   |      |        | X |  |  |    | X |   |
| P101 | DSA- | 4.68 % |   | 0.15 %  | 0.06% | 0.06% |   |      |        | X |  |  |    |   |   |
| P102 | DSA- |        |   |         |       |       |   |      |        | X |  |  |    | X |   |
| P103 | DSA- | 0.44 % |   | 0.11 %  | 0.07% | 0.02% |   |      |        | X |  |  |    |   |   |
| P104 | DSA- |        |   |         |       |       |   | 1277 | 787.12 | X |  |  |    | X |   |
| P105 | DSA- | 0.20 % | X | 1.32 %  | 0.79% | 0.39% | X |      |        | X |  |  |    |   | X |

**Table S3. Phenotypic patterns of cT<sub>FH</sub> cell clusters**

| cluster | markers                                                                                                                                                                                                                        | polarization | differentiation | activation     | proliferation |
|---------|--------------------------------------------------------------------------------------------------------------------------------------------------------------------------------------------------------------------------------|--------------|-----------------|----------------|---------------|
| 1       | PD-1 <sup>low</sup> CD38 <sup>+</sup> CD127 <sup>+/-</sup> OX40 <sup>+</sup> IL-6R <sup>+</sup>                                                                                                                                | Th0          | effector memory | semi-activated | no            |
| 2       | CD127 <sup>+/-</sup> CD28 <sup>+</sup> c-Maf <sup>+</sup> CD25 <sup>+</sup> OX40 <sup>+</sup> CXCR3 <sup>+</sup> CCR6 <sup>+</sup> IL-6R <sup>+</sup>                                                                          | Th1/17       | effector memory | resting        | no            |
| 3       | CD127 <sup>+/-</sup> CD25 <sup>+</sup> FoxP3 <sup>+</sup> OX40 <sup>+</sup> CXCR3 <sup>+</sup> Tbet <sup>+</sup> IL-6R <sup>+</sup>                                                                                            | Th1          | effector memory | resting        | no            |
| 4       | Ki67 <sup>hi</sup> ICOS <sup>hi</sup> PD1 <sup>hi</sup> CD38 <sup>+</sup> CCR7 <sup>+</sup> CD127 <sup>+</sup> CD28 <sup>+</sup> c-Maf <sup>+</sup> IRF4 <sup>+</sup> IL-21R <sup>+</sup> GATA3 <sup>+</sup> CCR6 <sup>+</sup> | Th2/Th17     | central memory  | activated      | yes           |
| 5       | CD38 <sup>+</sup> CD25 <sup>+</sup> FoxP3 <sup>+</sup> IL-6R <sup>+</sup>                                                                                                                                                      | Treg         | effector memory | semi-activated | no            |
| 6       | CD38 <sup>+</sup> CD28 <sup>+</sup> c-Maf <sup>+</sup> CD25 <sup>+</sup> OX40 <sup>+</sup> IL-6R <sup>+</sup>                                                                                                                  | Th0          | effector memory | semi-activated | no            |
| 7       | CD127 <sup>+</sup> CD28 <sup>+</sup> IRF4 <sup>+</sup> CD25 <sup>+</sup> OX40 <sup>+</sup> IL-6R <sup>+</sup>                                                                                                                  | Th0          | effector memory | resting        | no            |
| 8       | Ki67 <sup>low</sup> ICOS <sup>low</sup> PD1 <sup>hi</sup> CD38 <sup>+</sup> CCR7 <sup>+</sup> CD127 <sup>+</sup> CD28 <sup>+</sup> c-Maf <sup>+</sup> IRF4 <sup>+</sup> IL-21R <sup>+</sup> Tbet <sup>+</sup>                  | Th1          | central memory  | activated      | yes           |
| 9       | CD38 <sup>+</sup> CD127 <sup>+</sup> CD28 <sup>+</sup> c-Maf <sup>+</sup> CD25 <sup>+</sup> OX40 <sup>+</sup> CXCR3 <sup>+</sup> IL-6R <sup>+</sup>                                                                            | Th1          | effector memory | semi-activated | no            |
| 10      | PD-1 <sup>low</sup> CD38 <sup>+</sup> CD28 <sup>+</sup> c-Maf <sup>+</sup> CD25 <sup>+</sup> OX40 <sup>+</sup> CCR6 <sup>+</sup> IL-6R <sup>+</sup>                                                                            | Th17         | effector memory | semi-activated | no            |

Treg, T regulatory cells

Polarization was defined according to expression of CXCR3 and CCR6

Differentiation was defined according to expression of CCR7

Activation was defined according to expression of ICOS, PD-1 and CD38

Proliferation was defined according to expression of Ki67

**Table S4. Impacted canonical pathways in cT<sub>FH</sub> from DSA+ABMR+ versus DSA- patients predicted by Ingenuity Pathway Analysis**

| Ingenuity Canonical Pathways                      | -log(p-value)* | Genes                                                                                                                                      |
|---------------------------------------------------|----------------|--------------------------------------------------------------------------------------------------------------------------------------------|
| LXR/RXR Activation                                | 7.18           | IL1A, TNFRSF1A, CD36, IL6, ABCA1, TLR4, LYZ, CCL2, IL1RN, ITIH4, CD14, IL1B, S100A8, PTGS2, RXRA, IL1RAP, CLU, CYP51A1                     |
| iCOS-iCOSL Signaling in T Helper Cells            | 4.75           | <b>CD40LG, CAMK4, PRKCQ, CD3E, NFKBIE, FGFR2, CD3D, CD28, NFKBID, CD3G, LCK, HLA-DMA, ICOS, HLA-DRA, LAT, FCER1G, ITK</b>                  |
| CD28 Signaling in T Helper Cells                  | 4.24           | <b>CAMK4, PRKCQ, CD3E, NFKBIE, FGFR2, CD3D, CTLA4, CD28, NFKBID, CD3G, LCK, HLA-DMA, SYK, HLA-DRA, LAT, FCER1G, ITK</b>                    |
| Role of NFAT in Regulation of the Immune Response | 3.99           | <b>CAMK4, PRKCQ, CD3E, FCGR2A, NFKBIE, GNB5, FGFR2, CD3D, CD28, NFKBID, CD3G, LCK, HLA-DMA, SYK, HLA-DRA, LAT, FCER1G, LYN, PLCB1, ITK</b> |
| Th1 Pathway                                       | 3.93           | <b>CD40LG, ICAM1, PRKCQ, CD3E, HAVCR2, IFNGR2, FGFR2, IL6, CD3D, CD3G, CD28, NFIL3, HLA-DMA, HLA-DRA, ICOS, DLL4</b>                       |
| Calcium-induced T Lymphocyte Apoptosis            | 3.54           | <b>CD3G, LCK, PRKCQ, CAMK4, CD3E, HLA-DMA, HLA-DRA, NR4A1, FCER1G, CD3D</b>                                                                |
| Th2 Pathway                                       | 3.45           | CCR1, ICAM1, <b>PRKCQ, CD3E, MAF, FGFR2, CD3D, SPI1, CD3G, CD28, HLA-DMA, HLA-DRA, ICOS, S1PR1, JAG1, ACVR2A</b>                           |
| PPAR Signaling                                    | 3.01           | NFKBID, IL1A, SRA1, IL1RN, TNFRSF1A, NFKBIE, IL1B, PTGS2, INSR, RXRA, IL1RAP, PDGFC                                                        |

Genes in bold are the genes upregulated in DSA+ABMR+ versus DSA- group

\*Statistical analysis was performed using Fisher's exact test.

**Table S5. Upstream regulators of differentially expressed genes in cT<sub>FH</sub> from DSA+ABMR+ versus DSA- patients predicted by Ingenuity Pathway Analysis**

| <b>Upstream regulator</b> | <b>Molecule type</b>    | <b>Predicted activation state</b> | <b>Activation z-score</b> | <b>P-value</b> |
|---------------------------|-------------------------|-----------------------------------|---------------------------|----------------|
| STAT3                     | transcription regulator | activated                         | 2.121                     | 9.90E-04       |
| IL-2                      | cytokine                | inhibited                         | -2.478                    | 3.03E-11       |

**Table S6. DSA characteristics**

|                                                     | <b>Overall<br/>DSA+</b> | <b>DSA+<br/>ABMR-</b> | <b>DSA+<br/>ABMR+</b> | <b>P value*</b> |
|-----------------------------------------------------|-------------------------|-----------------------|-----------------------|-----------------|
|                                                     | <b>N=51</b>             | <b>N=31</b>           | <b>N=20</b>           |                 |
| DSA present before transplantation, n(%)            | 19 (37.3)               | 11 (35.5)             | 8 (40.0)              | 0.745           |
| Post-tranplant DSA detection (months), mean ± SEM   | 3.3 ± 0.7               | 2.9 ± 0.8             | 3.9 ± 1.1             | 0.920           |
| Early post-transplant DSA detection ≤ 3-month, n(%) | 39 (76.5)               | 26 (83.9)             | 13 (65.0)             | 0.121           |
| Transient DSA, n(%)**                               | 6 (11.8)                | 6 (19.4)              | 0 (0)                 | 0.070           |
| HLA class specificity, n(%)                         |                         |                       |                       |                 |
| HLA class I                                         | 14 (27.5)               | 11 (35.5)             | 3 (15.0)              | 0.198           |
| HLA class II                                        | 23 (45.1)               | 16 (51.6)             | 7 (35.0)              | 0.244           |
| HLA class I + II                                    | 14 (27.4)               | 4 (12.9)              | 10 (50.0)             | 0.009           |
| MFI, mean ± SEM***                                  | 6456 ± 688              | 4736 ± 712            | 9122 ± 1149           | 0.001           |
| IgG subclasses reactivity, n(%)****                 | 25 (67.6) /37           | 11 (57.9) /19         | 14 (77.8) /18         | 0.197           |
| Single IgG subclass reactivity                      | 13 (35.1)               | 8 (42.1)              | 5 (27.8)              | 0.362           |
| Multiple IgG subclasses reactivity                  | 12 (32.4)               | 3 (15.8)              | 9 (50)                | 0.038           |

ABMR, antibody-mediated rejection; DSA, donor-specific antibody; HLA, human leukocyte antigen; MFI, mean fluorescence intensity

\*Mann-Whitney and chi-squared test were used for statistical comparison of continuous and categorical variables, respectively

\*\*one single DSA detection post-transplant during the first 24-months post-transplant

\*\*\*MFI of the DSA with the highest MFI value

\*\*\*\*14 out of 51 samples were not tested for IgG subclasses

**Table S7. Antibodies**

| <b>Marker</b> | <b>Dye</b>       | <b>Clone</b> | <b>Vendor</b> |
|---------------|------------------|--------------|---------------|
| Blimp1        | AF647            | 6D3          | BD            |
| c-Maf         | eFluor 660       | sym0F1       | Invitrogen    |
| CCR6          | PE-Cy7           | 11A9         | BD            |
| CCR7          | BV711            | 3D12         | BD            |
| CD11c         | BV510            | B-ly6        | BD            |
| CD127         | BV510            | HIL-7R-M21   | BD            |
| CD19          | APC-eFluor 780   | SJ25C1       | Invitrogen    |
| CD20          | BV570            | 2H7          | Biolegend     |
| CD21          | APC              | Bu32         | Biolegend     |
| CD24          | BV605            | ML5          | BD            |
| CD25          | APC-Cy7          | M-A251       | BD            |
| CD27          | PE-Cy7           | O323         | Invitrogen    |
| CD28          | PE-Cy5           | CD28.2       | BD            |
| CD3           | BV750            | SK7          | Biolegend     |
| CD3           | BV510            | SK7          | Biolegend     |
| CD38          | PE-CF594         | HIT2         | BD            |
| CD4           | BV605            | RPA-T4       | BD            |
| CD40L         | eFluor 450       | 24-31        | eBiosciences  |
| CD45RO        | BV570            | UCHL1        | Biolegend     |
| CD71          | PE               | CY1G4        | Biolegend     |
| CD8           | PerCp-Cy5.5      | SK1          | BD            |
| CD86          | PE-Cy5           | IT2.2        | Biolegend     |
| CD95          | PerCP-Cy5.5      | DX2          | BD            |
| CXCR3         | AF700            | 1C6/CXCR3    | BD            |
| CXCR3         | BV605            | G025H7       | Biolegend     |
| CXCR5         | AF488            | RF8B2        | BD            |
| FoxP3         | APC              | PCH101       | Invitrogen    |
| GATA3         | BV421            | L50-823      | BD            |
| ICOS          | PerCP-eFluor 710 | ISA-3        | Invitrogen    |
| IFNg          | Alexa 700        | B27          | BD            |
| IgD           | BV421            | IA6-2        | BD            |
| IL-17a        | PE               | N49-653      | BD            |
| IL-21         | APC              | 3A3-N2.1     | BD            |
| IL-21R        | BV786            | 17A12        | BD            |
| IL-4          | PE-CF594         | MP4-25D2     | BD            |
| IL-6R         | BB515            | M5           | BD            |
| IRF4          | eFluor 450       | 3E 4         | Invitrogen    |
| IRF8          | PerCP-eFluor 710 | V3GYWCH      | Invitrogen    |
| Ki67          | BV480            | B56          | BD            |
| OX40          | PerCP-Cy5.5      | ACT35        | BD            |
| PD-1          | BV650            | EH12.1       | BD            |
| RORgt         | BV650            | Q21-559      | BD            |
| Tbet          | PE               | 4B10         | BD            |
